# Supplementary material
Source: Springer Nature journal article supplement (https://www.springermedizin.de/resource/supplementary/12889_2009_2281_MOESM2_ESM.pdf/9485238)
Supplement: MOESM2 [file 9485238]

# Earliest date known to be on ART

Number of patients

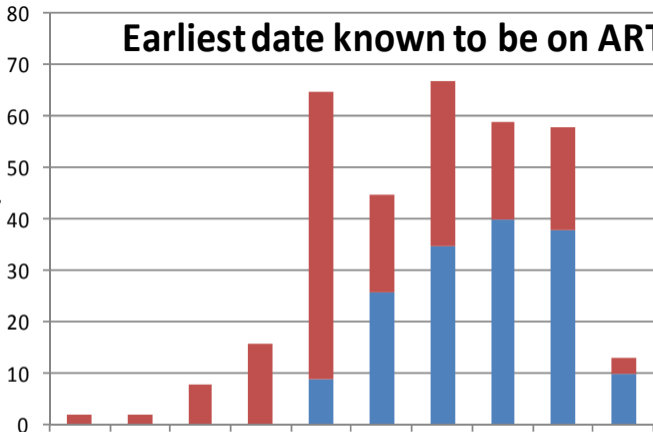

art started after initial assessment

art started before initial assessment

Jan-Jun 2004

Jul-Dec 2004

Jan-Jun 2005

Jul-Dec 2005

Jan-Jun 2006

Jul-Dec 2006

Jan-Jun 2007

Jul-Dec 2007

Jan-Jun 2008

Jul-Aug 2008

Date of initial assessment of those already on ART OR date starting ART after initial assessment
